# Supplementary material for: Valley-dependent topologically protected elastic waves using continuous graphene membranes on patterned substrates
Source: Royal Society of Chemistry journal article supplement (doi:10.1039/c9nr09809g), 2020-01-01
Supplement: c9nr09809g5.pdf [file c9nr09809g5.pdf]

*Supplemental Information for*

**Valley-dependent topologically protected elastic waves using  
continuous graphene membranes on patterned substrates**

Jaehyung Hong<sup>1</sup>, Joo Hwan Oh<sup>1</sup>, Harold S. Park<sup>2,\*</sup>, and Sung Youb Kim<sup>1,\*</sup>

<sup>1</sup>Department of Mechanical Engineering, Ulsan National Institute of Science and Technology, Ulsan 44919,  
Republic of Korea

<sup>2</sup>Department of Mechanical Engineering, Boston University, Boston, MA 02215, USA

\*To whom correspondence should be addressed, e-mail: [sykim@unist.ac.kr](mailto:sykim@unist.ac.kr); [parkhs@bu.edu](mailto:parkhs@bu.edu)

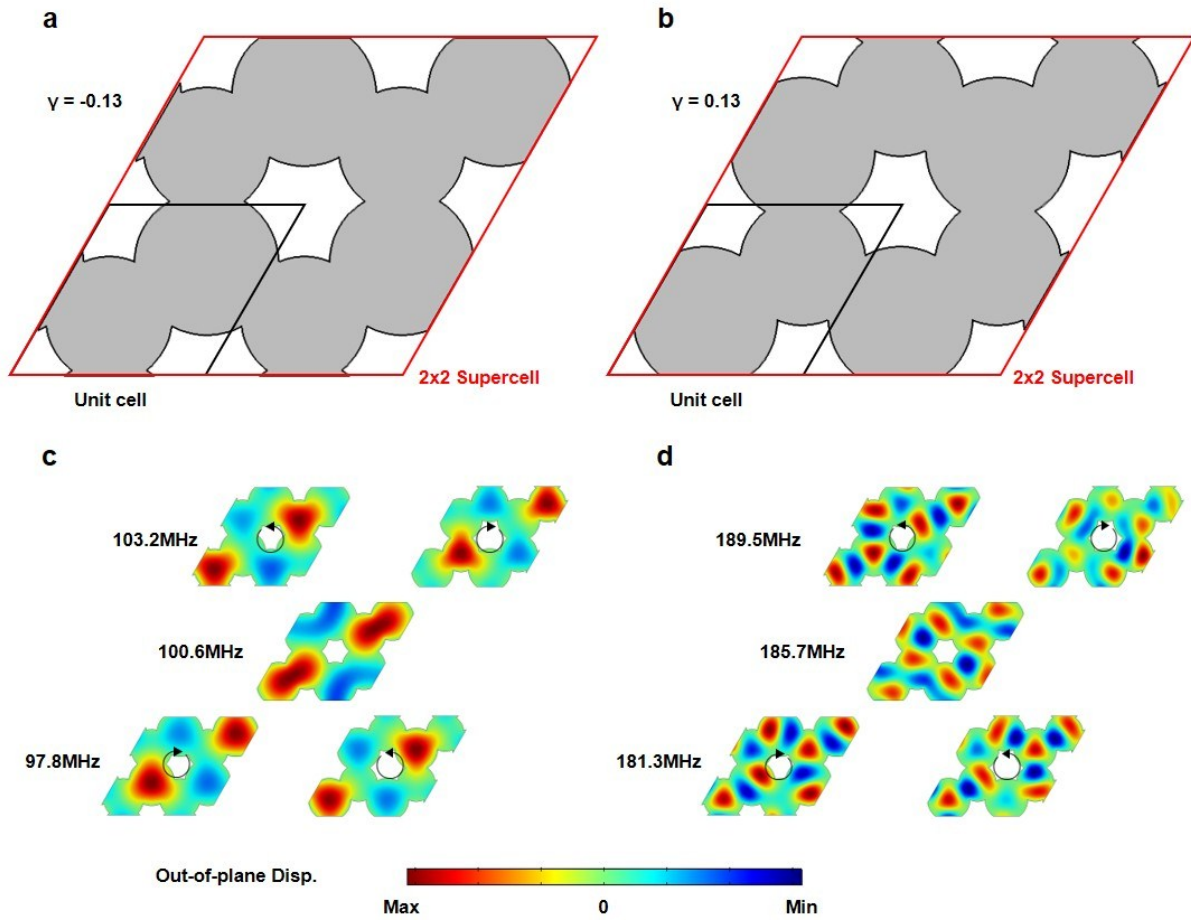

**Fig. S1.** Supercell and polarized modes in wave propagation.  $2 \times 2$  supercell configuration for (a)  $\gamma = -0.13$  and (b)  $\gamma = 0.13$ . Wave propagation mode with pseudospin-like polarization: symmetry case,  $\gamma = 0$  (Center), asymmetric case,  $\gamma = -0.13$  (Left), and  $\gamma = 0.13$  (Right) for (c) first bandgap region from 97.8MHz to 103.2MHz (d) second bandgap region from 181.3MHz to 189.5MHz.

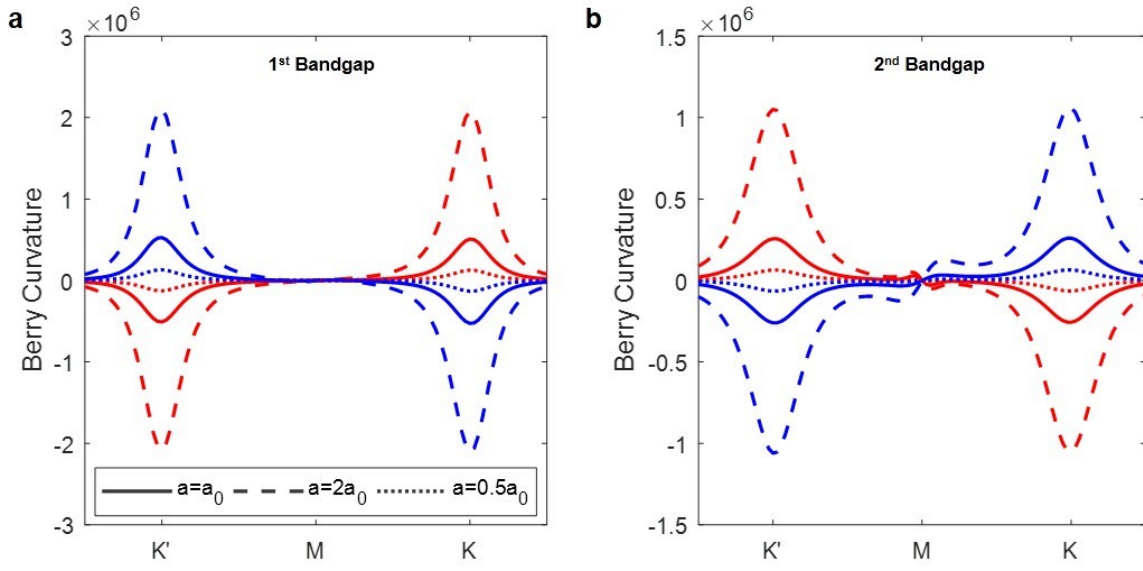

**Fig. S2.** Change in Berry curvature. Variation of valley-dependent Berry curvature with respect to change in lattice parameter for (a) first bandgap region and (b) second bandgap region.

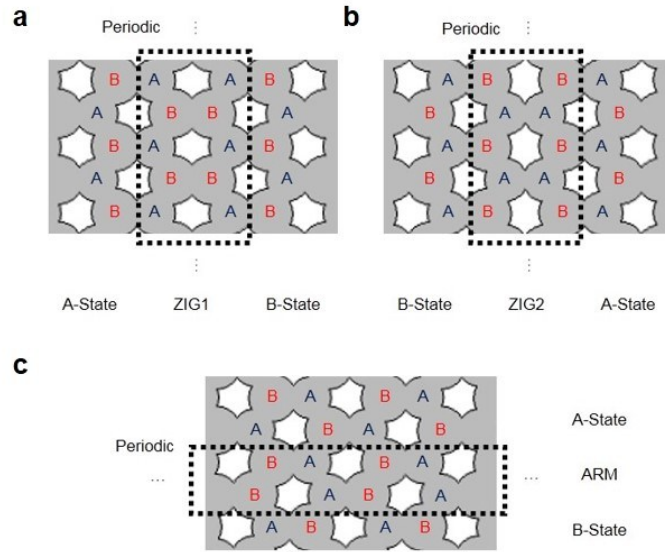

**Fig. S3.** Edge state structure. Possible edge state structures in the hexagonal lattice array. (a) ZIG1 edge type connecting A-B state, (b) ZIG2 edge type connecting B-A state, and (c) ARM edge type connecting A-B and B-A type identically.

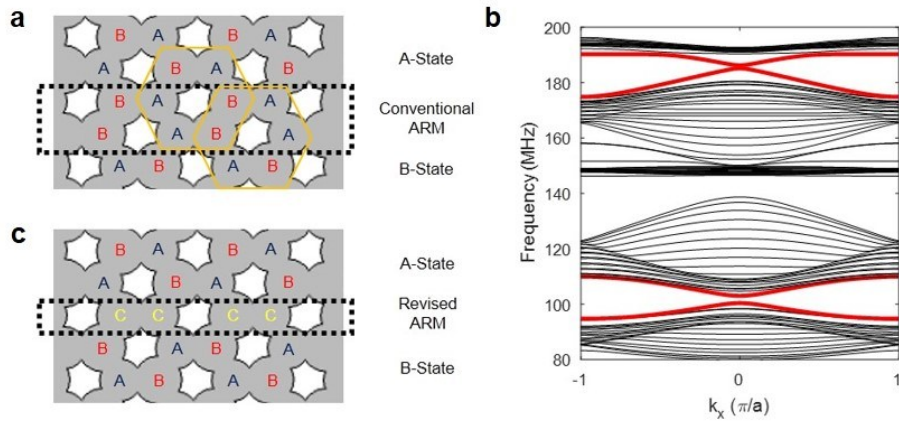

**Fig. S4.** Revised ARM edge states. (a) Intrinsic ARM edge state formation that breaks  $C_3$  symmetry (orange marked). (b) Frequency dispersion curve for intrinsic ARM edge that has extant bandgap at first bandgap region. (c) Revised ARM edge state formation that insert  $R_0$  type (symmetry) drum in order to improve symmetry.

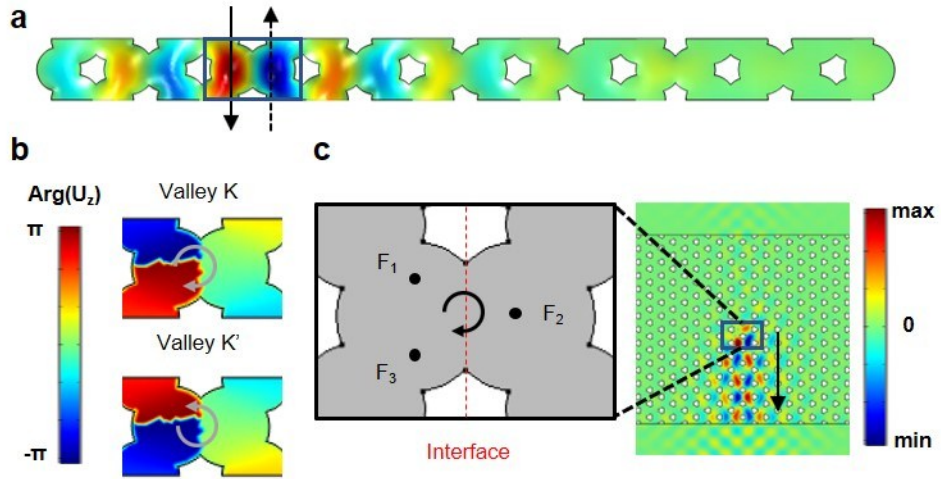

**Fig. S5.** (a) Edge state for ZIG1 edge in the first bandgap region; (b) phase distribution at the ZIG1 interface edge (c) full domain analysis for phased excitation based on phase distribution at valley K in ZIG1 edge.
